# Supplementary material for: Astaxanthin promotes the longevity of Caenorhabditis elegans via modulation of the intracellular redox status and PHA-4-mediated autophagy
Source: Royal Society of Chemistry journal article supplement (doi:10.1039/d4fo03490b), 2024-12-23
Supplement: d4fo03490b1.pdf [file d4fo03490b1.pdf]

## Supplementary data

**Table S1** List of gene primers used in qRT-PCR.

| Primer                 | Sequences (5' to 3')     |
|------------------------|--------------------------|
| <i>pmp-3</i> forward   | GTTCCCGTGTTTCATCACTCAT   |
| <i>pmp-3</i> reverse   | ACACCGTCGAGAAGCTGTAGA    |
| <i>daf-2</i> forward   | TCAAATGAACGAGGAGCCG      |
| <i>daf-2</i> reverse   | TGGAACACCGTAGGAAGAGC     |
| <i>age-1</i> forward   | CGGAAAGACCAAACCTGGGATC   |
| <i>age-1</i> reverse   | CGTAGGCTTCGACGCATAACG    |
| <i>akt-1</i> forward   | CAAAGCCTAAGGAAGGACAACC   |
| <i>akt-1</i> reverse   | CATGAATCCAACGCTGACGAAC   |
| <i>akt-2</i> forward   | ACATTCAGCGAAGCACGAACA    |
| <i>akt-2</i> reverse   | TACATGACCACTCCGACTCCC    |
| <i>daf-16</i> forward  | TCGTCGTCTCGTGTTTCTCCA    |
| <i>daf-16</i> reverse  | TTCCATAGGCACCCGGTAGTG    |
| <i>pha-4</i> forward   | GAACCACGCAAGCACAGATG     |
| <i>pha-4</i> reverse   | CGGGTTGGTGGAGCTGTAAA     |
| <i>ifg-1</i> forward   | AGCAAAGAGATCGTATGCAC     |
| <i>ifg-1</i> reverse   | ACAAACTTCAATAACCGCAG     |
| <i>let-363</i> forward | CACAGGCGAACTAATACCGT     |
| <i>let-363</i> reverse | TTTCCGAGTTGCTTGATGAT     |
| <i>rsk-1</i> forward   | GTTTGTGGGATTCACC         |
| <i>rsk-1</i> reverse   | TGGCTTTCTCGGGCTCTT       |
| <i>lgg-1</i> forward   | AACAACCTTGAGAAGCGTCGTGCC |
| <i>lgg-1</i> reverse   | ATCTTCTGGACGAAGTTGGATGCG |
| <i>ncr-1</i> forward   | AGGCCATGGAAGTTCAGAGA     |
| <i>ncr-1</i> reverse   | GCTGGCGTCCAGTAAAGAAG     |
| <i>asm-1</i> forward   | ACGATTCTGGCCAACATGGT     |
| <i>asm-1</i> reverse   | AAGTCCATCCATAACTTGTG     |
| <i>atg-5</i> forward   | CTGGCGGAACTCACGGAG       |
| <i>atg-5</i> reverse   | CGCTTGATCGTAGATCAC       |
| <i>vps-34</i> forward  | GTCGATTCTGCCTACCGGAT     |

|                       |                       |
|-----------------------|-----------------------|
| <i>vps-34</i> reverse | GGAGGCGTTGTTCGATCTTG  |
| <i>lmp-1</i> forward  | ATCCGCCACCGCTTCGCATT  |
| <i>lmp-1</i> reverse  | TCGAGCTCCCCTCTTTGGCG  |
| <i>skn-1</i> forward  | TTTTGCCTCCTCTCTTCTGGC |
| <i>skn-1</i> reverse  | GGCGTATGGATGTTGGTGATG |

**Table S2** Statistical analyses of the lifespan of *C. elegans* treated with astaxanthin

| Conc. (μg/mL) | Number | Mean lifespan (d) | Max. lifespan (d) |
|---------------|--------|-------------------|-------------------|
| 0             | 223    | 15.2 ± 0.2        | 23.3 ± 1.7        |
| 0.5           | 224    | 15.3 ± 0.3        | 24.3 ± 2.1        |
| 1             | 209    | 15.4 ± 0.3        | 25.7 ± 1.5        |
| 5             | 227    | 16.0 ± 0.3*       | 25.7 ± 0.8        |
| 10            | 210    | 16.1 ± 0.3*       | 26.0 ± 1.0        |
| 20            | 225    | 17.0 ± 0.3*       | 27.3 ± 0.7*       |

Worms from three independent experiments were combined for the analyses. The mean lifespans were analyzed by the Kaplan–Meir survival analysis of SPSS 22.0 and expressed as mean ± SEM. The maximum lifespans were the average maximum lifespan of three independent experiments.

\*Significantly different from the control-treated worms ( $p < 0.05$ ).

**Table S3** Effects of astaxanthin on lifespan in *skn-1* RNAi worms

| Group                           | Number | Mean lifespan (d)       | Max. lifespan (d)       |
|---------------------------------|--------|-------------------------|-------------------------|
| L4440 + Control                 | 194    | 16.1 ± 0.3 <sup>b</sup> | 25.3 ± 0.7 <sup>b</sup> |
| L4440 + Astaxanthin             | 204    | 17.7 ± 0.2 <sup>a</sup> | 28.3 ± 0.3 <sup>a</sup> |
| <i>skn-1</i> RNAi + Control     | 219    | 13.7 ± 0.1 <sup>c</sup> | 19.0 ± 1.0 <sup>c</sup> |
| <i>skn-1</i> RNAi + Astaxanthin | 217    | 13.8 ± 0.2 <sup>c</sup> | 19.3 ± 0.3 <sup>c</sup> |

Worms from three independent experiments were combined for the analyses. The mean lifespans were analyzed by the Kaplan–Meir survival analysis of SPSS 22.0 and expressed as mean ± SEM. The maximum lifespans were the average maximum lifespan of three independent experiments.

Different letters denote mean values that are statistically different at  $p < 0.05$ .

**Table S4** Lifespan of *C. elegans* treated with astaxanthin in the presence of chloroquine

| Group                     | Number | Mean lifespan (d)       | Max. lifespan (d)        |
|---------------------------|--------|-------------------------|--------------------------|
| Control                   | 240    | 14.2 ± 0.1 <sup>c</sup> | 20.0 ± 1.0 <sup>b</sup>  |
| Astaxanthin               | 226    | 16.0 ± 0.2 <sup>a</sup> | 23.7 ± 0.3 <sup>a</sup>  |
| Chloroquine               | 239    | 14.9 ± 0.2 <sup>b</sup> | 21.7 ± 0.7 <sup>ab</sup> |
| Astaxanthin + Chloroquine | 234    | 14.3 ± 0.2 <sup>c</sup> | 22.7 ± 1.2 <sup>ab</sup> |

Worms from three independent experiments were combined for the analyses. The mean lifespans

were analyzed by the Kaplan–Meir survival analysis of SPSS 22.0 and expressed as mean  $\pm$  SEM. The maximum lifespans were the average maximum lifespan of three independent experiments. Different letters denote mean values that are statistically different at  $p < 0.05$ .

**Table S5** Effects of astaxanthin on lifespan in *pha-4* RNAi worms

| Group                           | Number | Mean lifespan (d)           | Max. lifespan (d)            |
|---------------------------------|--------|-----------------------------|------------------------------|
| L4440 + Control                 | 246    | 16.5 $\pm$ 0.2 <sup>b</sup> | 25.7 $\pm$ 0.3 <sup>b</sup>  |
| L4440 + Astaxanthin             | 260    | 17.8 $\pm$ 0.3 <sup>a</sup> | 29.7 $\pm$ 0.3 <sup>a</sup>  |
| <i>pha-4</i> RNAi + Control     | 254    | 15.5 $\pm$ 0.2 <sup>c</sup> | 23.0 $\pm$ 1.0 <sup>c</sup>  |
| <i>pha-4</i> RNAi + Astaxanthin | 255    | 15.6 $\pm$ 0.2 <sup>c</sup> | 25.0 $\pm$ 0.6 <sup>bc</sup> |

Worms from three independent experiments were combined for the analyses. The mean lifespans were analyzed by the Kaplan–Meir survival analysis of SPSS 22.0 and expressed as mean  $\pm$  SEM. The maximum lifespans were the average maximum lifespan of three independent experiments. Different letters denote mean values that are statistically different at  $p < 0.05$ .

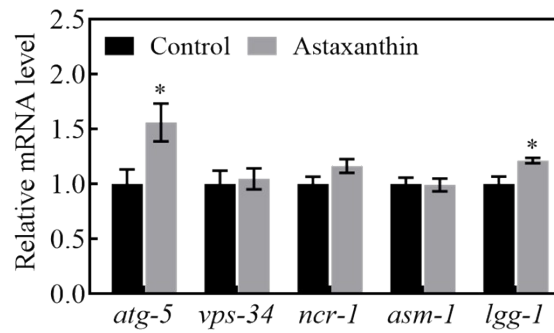

**Fig. S1.** Effects of astaxanthin (20  $\mu$ g/mL) on the expression of ALP-related genes in *skn-1* RNAi worms. The *skn-1* RNAi worms were treated with astaxanthin for 6 d before RNA extraction. The mRNA levels were determined by qRT-PCR and normalized to the expression of *pmp-3*.
